# Supplementary material for: Identification of African swine fever virus-like elements in the soft tick genome provides insights into the virus’ evolution
Source: PubMed Central journal article supplement (PMC7542975; doi:10.1186/s12915-020-00865-6), 2020-10-08

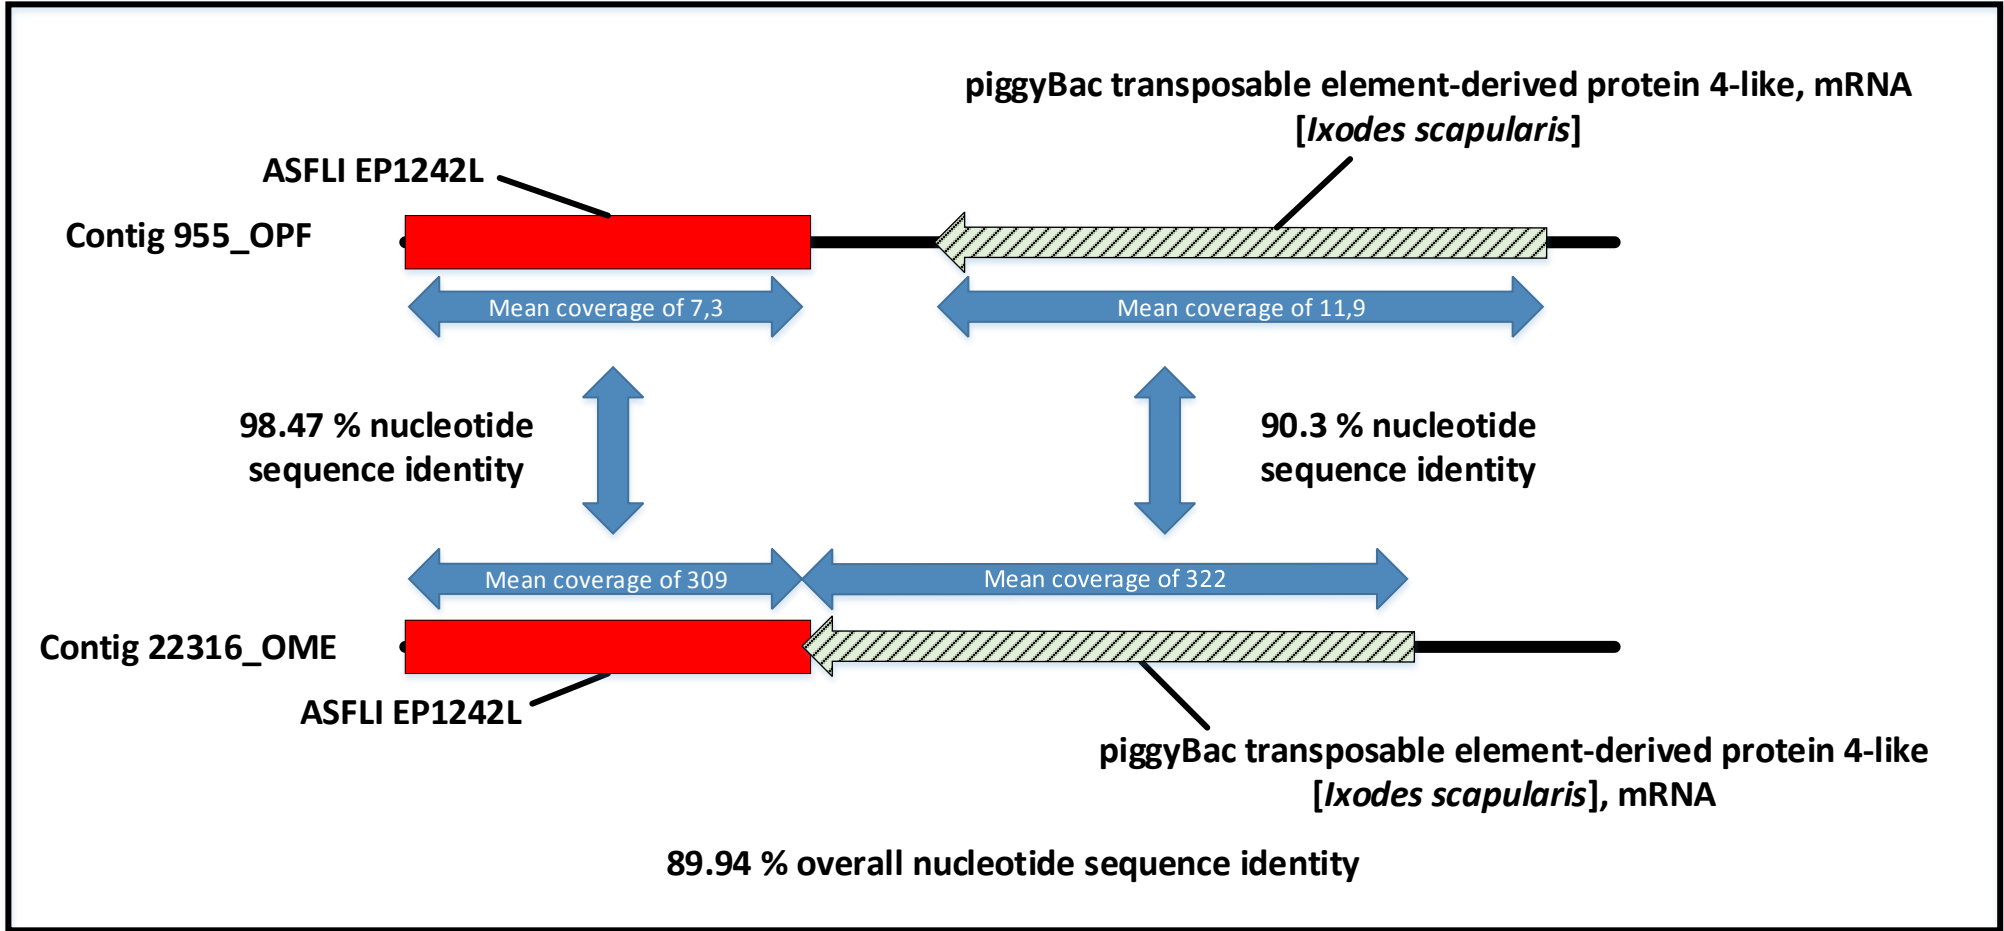

 ASFLI-element

 Tick mobile genetic element

0 bp 800 bp



Supplement: 12915_2020_865_MOESM8_ESM.pdf [file 12915_2020_865_MOESM8_ESM.pdf]
